# Supplementary material
Source: MDPI journal article supplement (https://www.mdpi.com/2073-4344/11/10/1146)
Supplement: s1 [file s1 › catalysts-1340971-supplementary.pdf]

## SUPPORTING INFORMATION

### Practical approaches towards NO<sub>x</sub> emission mitigation from Fluid Catalytic Cracking (FCC) units

Aleksei Vjunov\*, Karl C. Kharas, Vasileios Komvokis, Amy Dundee & Bilge Yilmaz\*

BASF Corporation, 25 Middlesex/Essex Turnpike, Iselin, NJ, 08830, USA

\* Correspondence: Aleksei Vjunov [aleksei.vjunov@basf.com](mailto:aleksei.vjunov@basf.com); Bilge Yilmaz [bilge.yilmaz@basf.com](mailto:bilge.yilmaz@basf.com)

#### **Additional Catalyst Testing**

In order to explore if the mixture of two well-performing catalysts would be more interesting to the refiner than either one of the components by itself, we have carried out additional experimentation and compiled the data in Figure S1 below. From Figure S1, we see that Reference-2 is superior in CO oxidation, when compared to a 50/50 mixture of Catalyst A and Reference-2. This mixture is not a calculation, but an actual sample that was measured in the same way and under the same conditions as all other samples presented in the manuscript. At the same time, Reference-2 also tends to generate more NO<sub>x</sub>. Note that the CO/NO<sub>x</sub> ratio for Reference-2 is 0.67 and 0.71 for the 50/50 mixture of Reference-2 with Catalyst A. While the ratio is favorable for the mixture, the absolute CO conversion values are quite different: 53.8% vs 42.1%. This would imply the prospective refiner would need to adjust dosing, which in this case would mean some 25-27% increase in promoter consumption, should the FCC unit need to reach the CO efficiency of Reference-2. In fact, if we increase the dosing to match the CO activity (Reference-2 + Catalyst A norm in Figure S1), there is minimal difference in NO<sub>x</sub> generation, as one would expect from the CO/NO<sub>x</sub> ratio.

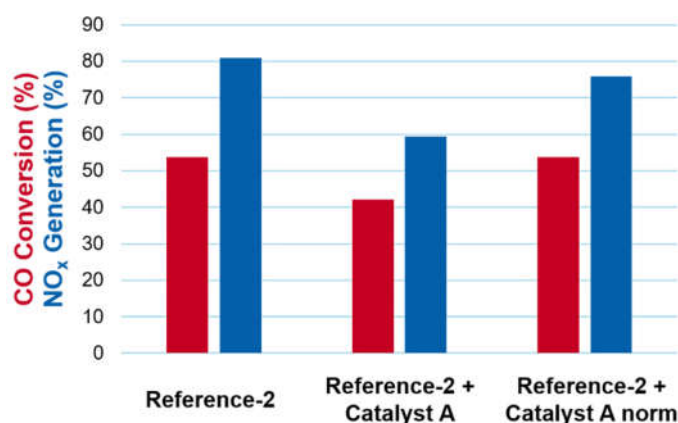

**Figure S1.** The CO conversion and NO<sub>x</sub> generation emission values observed for selected catalysts are reported. The values are generated following the procedure described in Section 2.2.

### Cost of performance

**Table S1.** The estimated PGM cost as well as measured CO conversion, NO<sub>x</sub> generation and CO/NO<sub>x</sub> ratio values for the samples discussed in this contribution are reported.

| Promoter    | PGM Cost (\$/kg) <sup>1</sup> | CO conversion (%) | NO <sub>x</sub> generation (%) | CO/NO <sub>x</sub> ratio |
|-------------|-------------------------------|-------------------|--------------------------------|--------------------------|
| Reference-1 | 230                           | 47.0              | 80.6                           | 0.58                     |
| Reference-2 | 450                           | 53.7              | 80.9                           | 0.67                     |
| Reference-3 | 910                           | 55.7              | 90.2                           | 0.62                     |
| Catalyst A  | 10                            | 23.5              | 35.3                           | 0.67                     |
| Catalyst B  | 450                           | 46.8              | 65.1                           | 0.72                     |
| Catalyst C  | 450                           | 49.8              | 67.5                           | 0.74                     |
| Catalyst D  | 10                            | 4.8               | 6.8                            | 0.71                     |
| Catalyst E  | 450                           | 47.7              | 67.5                           | 0.71                     |
| Catalyst F  | 450                           | 47.6              | 79.1                           | 0.60                     |
| Catalyst G  | 107                           | 72.5              | 107.6                          | 0.67                     |

<sup>1</sup>The cost is reported as estimated cost based on PGM pricing at the time of publication (Q3 2021). For simplicity and ease of comparison, they do not include other variable and manufacturing fixed cost contributions. As noted in the manuscript, the cost of base metal dopants in the studied promoter catalysts is < ~0.1 \$/kg and is therefore rounded up when reporting estimated values.
